CORRECTION

# Correction: From Innovation to Diversification: A Simple Competitive Model

The *PLOS ONE* Staff

There are errors in the Funding section. The correct funding information is as follows: Fabio Saracco has been paid by Crisis Lab in the first submission, and Riccardo Di Clemente has been paid by Growthcom Project FP7, Grant Agreement 611272.

The publisher apologizes for the error.

## Reference

1. Saracco F, Di Clemente R, Gabrielli A, Pietronero L (2015) From Innovation to Diversification: A Simple Competitive Model. *PLoS ONE* 10(11): e0140420. doi:[10.1371/journal.pone.0140420](https://doi.org/10.1371/journal.pone.0140420) PMID: [26544685](https://pubmed.ncbi.nlm.nih.gov/26544685/)

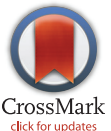

## OPEN ACCESS

**Citation:** The *PLOS ONE* Staff (2015) Correction: From Innovation to Diversification: A Simple Competitive Model. *PLoS ONE* 10(12): e0144564. doi:[10.1371/journal.pone.0144564](https://doi.org/10.1371/journal.pone.0144564)

**Published:** December 3, 2015

**Copyright:** © 2015 The PLOS ONE Staff. This is an open access article distributed under the terms of the [Creative Commons Attribution License](https://creativecommons.org/licenses/by/4.0/), which permits unrestricted use, distribution, and reproduction in any medium, provided the original author and source are credited.
